# Supplementary material for: Streamlining the conversion of biomass to polyesters: bicyclic monomers with continuous flow
Source: Royal Society of Chemistry journal article supplement (doi:10.1039/c3gc41479e), 2013-11-11
Supplement: c3gc41479e.pdf [file c3gc41479e.pdf]

Supplementary Information for:

# Streamlining the Conversion of Biomass to Polyesters: Bicyclic Monomers with Continuous Flow

Deivasagayam Dakshinamoothy,<sup>1</sup> Stewart P. Lewis,<sup>1,‡</sup> Michael P. Cavazza,<sup>1</sup> Aaron M. Hoover,<sup>1</sup>  
David F. Iwig,<sup>3</sup> Krishnan Damodaran,<sup>2</sup> Robert T. Mathers<sup>1\*</sup>

<sup>1</sup>Department of Chemistry, The Pennsylvania State University, New Kensington, Pennsylvania 15068. <sup>2</sup>Department of Chemistry, University of Pittsburgh, Pittsburgh, Pennsylvania 15260. <sup>3</sup>Alcoa Technical Center, 100 Technical Drive, Alcoa Center, Pennsylvania 15069.

\*To whom correspondence should be addressed. E-mail: [rtm11@psu.edu](mailto:rtm11@psu.edu).

## Table of Contents

|           |                                                                                                                                                 |
|-----------|-------------------------------------------------------------------------------------------------------------------------------------------------|
| Table S1  | Solubility studies for cyclohexadiene, maleic anhydride, and monomer <b>1</b> .                                                                 |
| Table S2  | Influence of time and temperature on the alkene isomerization reaction.                                                                         |
| Table S3  | Yield data as a function of temperature for neat Diels-Alder reaction between 1,3-CHD and maleic anhydride.                                     |
| Table S4  | Polymerization of anhydride <b>2</b> with glycerol and 1,4-BDO.                                                                                 |
| Table S5  | Influence of catalyst choice on polymerization of <b>2</b> and Glycerol.                                                                        |
| Figure S1 | Continuous flow setup for synthesis of monomers <b>1</b> and <b>2</b> .                                                                         |
| Figure S2 | Recycling of catalyst (Na/Na <sub>2</sub> O) for the isomerization of 1,4-CHD to 1,3-CHD.                                                       |
| Figure S3 | Comparison of Diels Alder reaction of maleic anhydride and 1,3-cyclohexadiene at different temperatures.                                        |
| Figure S4 | <sup>1</sup> H NMR spectrum (700 MHz, CDCl <sub>3</sub> ) for the Diels Alder product ( <b>1</b> ) of maleic anhydride and 1,3-cyclohexadiene.  |
| Figure S5 | <sup>13</sup> C NMR spectrum (700 MHz, CDCl <sub>3</sub> ) for the Diels Alder product ( <b>1</b> ) of maleic anhydride and 1,3-cyclohexadiene. |
| Figure S6 | FTIR data for the Diels Alder product ( <b>1</b> ) of maleic anhydride and 1,3-cyclohexadiene.                                                  |
| Figure S7 | LC/MS data for the Diels Alder adduct ( <b>1</b> ) of maleic anhydride and 1,3-cyclohexadiene.                                                  |

- Figure S8  $^1\text{H}$  NMR spectrum (700 MHz,  $\text{CDCl}_3$ ) for the product (**2**) resulting from the hydrogenation of the Diels Alder adduct (**1**) in ethyl acetate using Pd/C and hydrogen (20 psi).
- Figure S9  $^{13}\text{C}$  NMR spectrum (700 MHz,  $\text{CDCl}_3$ ) for the product (**2**) resulting from the hydrogenation of the Diels Alder adduct (**1**) in ethyl acetate using Pd/C and hydrogen (20 psi).
- Figure S10 Differential scanning calorimetry (DSC) data (20 °C/min) for the product (**2**) resulting from the hydrogenation of the Diels Alder adduct.
- Figure S11 FTIR data for the product (**2**) resulting from the hydrogenation of the Diels Alder adduct (**1**) in ethyl acetate using Pd/C and hydrogen (20 psi).
- Figure S12 LC/MS data for the product resulting from the hydrogenation of the Diels Alder adduct in ethyl acetate using Pd/C and hydrogen (20 psi).
- Figure S13 Overlay FTIR spectrum of the disappearance of the alkene C-H absorbance (3055  $\text{cm}^{-1}$ ) for the hydrogenation of Diels Alder product (monomer **1**).
- Figure S14 Comparison of continuous flow hydrogenation data for a) cyclooctene and b) Diels Alder product (monomer **1**).
- Figure S15 Continuous flow hydrogenation of Diels Alder product (monomer **1**) with 0.30 g of Pd/C and 125 psi hydrogen.
- Figure S16  $^1\text{H}$  NMR spectrum (700 MHz,  $\text{CDCl}_3$ ) of polyester synthesized from bicyclic anhydride **2** and glycerol after 24 h at 120 °C.
- Figure S17  $^{13}\text{C}$  NMR spectrum (700 MHz,  $\text{CDCl}_3$ ) of polyester synthesized from bicyclic anhydride **2** and glycerol after 24 h at 120 °C.

Figure S18 Dependence of glass transition temperature on  $M_w$  for the polymerization of glycerol with anhydride **2** ( $[\text{glycerol}]/[\text{anhydride } \mathbf{2}] = 1$ ).

Figure S19 Correlation between the glass transition temperature and the reaction time for the polymerization of glycerol with anhydride **2** ( $[\text{glycerol}]/[\text{anhydride } \mathbf{2}] = 1$ ).

**Table S1:** Solubility studies for cyclohexadiene, maleic anhydride, and monomer **1**.<sup>a</sup>

|                     | Acetone | Ethanol | Ethyl<br>acetate | Hexanes   | Methanol | Toluene          | DI water  | Tetrahydrofuran |
|---------------------|---------|---------|------------------|-----------|----------|------------------|-----------|-----------------|
| Maleic<br>anhydride | 2.317   | 0.246   | 0.595            | insoluble | 0.979    | semi-<br>soluble | 0.579     | 1.392           |
| 1,3-CHD             | soluble | soluble | soluble          | soluble   | soluble  | soluble          | insoluble | soluble         |
| Monomer<br><b>1</b> | soluble | 0.0338  | 0.196            | insoluble | 0.0396   | 0.104            | insoluble | 0.422           |

<sup>a</sup>Solubility studies were conducted at ambient temperature with stirred solutions.

Solubility values are given in grams solute/gram solvent.

**Table S2.** Influence of time and temperature on the alkene isomerization reaction.<sup>a</sup>

| Entry | Reaction <sup>b</sup> | Temp<br>(° C) | Time<br>(min) | Flow rate<br>(mL/min) | Residence<br>time (sec) | [1,3-CHD]/<br>[1,4-CHD] <sup>c</sup> | Benzene<br>(%) <sup>c</sup> | Abs <sub>3036</sub> /<br>Abs <sub>3091</sub> <sup>d</sup> |
|-------|-----------------------|---------------|---------------|-----------------------|-------------------------|--------------------------------------|-----------------------------|-----------------------------------------------------------|
| 1     | Continuous            | 25            | -             | 1.5±1                 | 13±1                    | 1.9                                  | 68                          | 1.96                                                      |
| 2     | Continuous            | 11            | -             | 1.3±1                 | 15±1                    | 1.8                                  | 13                          | 5.2                                                       |
| 3     | Continuous            | 0             | -             | 1.5±1                 | 13±1                    | 1.1                                  | 7                           | 6.7                                                       |
| 4     | Batch                 | 5             | 5             | -                     | -                       | 1.7                                  | 3                           | -                                                         |
| 5     | Batch                 | 5             | 15            | -                     | -                       | 1.8                                  | 6                           | -                                                         |
| 6     | Batch                 | 5             | 45            | -                     | -                       | 1.8                                  | 10                          | -                                                         |
| 7     | Batch                 | 5             | 140           | -                     | -                       | 1.8                                  | 14                          | -                                                         |
| 9     | Batch                 | 5             | 260           | -                     | -                       | 1.8                                  | 14                          | -                                                         |

<sup>a</sup>All reactions were conducted with neat 1,4-CHD derived from soybean oil that contained ~20 % dodecene isomers which result from monounsaturated triglycerides. <sup>b</sup>Continuous flow reactions flushed 2 mL of 1,4-CHD through a catalyst tube (ID 2.1 mm x 100 mm) with 100 mg of Na<sub>2</sub>O/Na/Al<sub>2</sub>O<sub>3</sub> catalyst. Batch reactions used 2 mL of 1,4-CHD and 17 mg of Na<sub>2</sub>O/Na/Al<sub>2</sub>O<sub>3</sub> catalyst in a vial under nitrogen. <sup>c</sup>Based on GC analysis of product mixtures indicating lower temperature and shorter reactions times are beneficial. <sup>d</sup>FTIR data for ratio of 1,3-CHD absorbance at 3036cm<sup>-1</sup> and benzene absorbance at 3091 cm<sup>-1</sup>.

**Table S3.** Yield data as a function of temperature for neat Diels-Alder reaction between 1,3-CHD and maleic anhydride.

| Entry | T<br>(°C) | Time<br>(h) | % Yield<br>based on MA |
|-------|-----------|-------------|------------------------|
| 1     | 25        | 12          | 6.5                    |
| 2     | 25        | 24          | 9.1                    |
| 3     | 30        | 12          | 11.8                   |
| 4     | 30        | 24          | 13.6                   |
| 5     | 30        | 24          | 12.2                   |
| 6     | 40        | 24          | 85.0                   |
| 7     | 40        | 24          | 84.5                   |
| 8     | 50        | 24          | 88.2                   |
| 9     | 50        | 24          | 82.7                   |
| 10    | 60        | 24          | 88.0                   |

[MA] = 12.6 mmol

[CHD] = 19.3 mmol

**Table S4:** Comparison of polymerization of anhydride **2** with glycerol and 1,4-BDO.<sup>a</sup>

| Entry | Monomers | M <sub>w</sub><br>(g/mol) <sup>b</sup> | M <sub>w</sub> /M <sub>n</sub><br><sup>b</sup> | [η] <sup>b</sup><br>(mL/g) | Abs <sub>1726</sub> /Abs <sub>1776</sub><br><sup>c</sup> | T <sub>g</sub> <sup>d</sup><br>(°C) | T <sub>d</sub> <sup>e</sup><br>(°C) | X <sub>n</sub> <sup>f</sup> |
|-------|----------|----------------------------------------|------------------------------------------------|----------------------------|----------------------------------------------------------|-------------------------------------|-------------------------------------|-----------------------------|
| 1     | 1,4-BDO  | 8730                                   | 1.4                                            | 6.8                        | 1.9                                                      | 13                                  | 185                                 | 25                          |
| 2     | glycerol | 9350                                   | 2.2                                            | 6.7                        | 10                                                       | 57                                  | 286                                 | 17                          |

<sup>a</sup>Polymerizations were conducted at 120°C for 24 h under dynamic vacuum (150 mbar) with [glycerol or 1,4-BDO]/[**2**] = 1. <sup>b</sup>Measured by GPC in THF at 35°C using light scattering and viscometer detectors. <sup>c</sup>Absorbance ratios of ester (1726 cm<sup>-1</sup>) and anhydride (1776 cm<sup>-1</sup>) peaks determined by FTIR spectroscopy. <sup>d</sup>Measured by DSC (20 °C/min) under nitrogen. <sup>e</sup>Decomposition temperature reflects 5 % weight loss as measured by TGA (20 °C/min) under nitrogen. <sup>f</sup>Number-average degree of polymerization calculated from GPC data.



**Table S5:** Influence of catalyst choice on polymerization of **2** and glycerol.<sup>a</sup>

| Entry | Catalyst             | M <sub>w</sub><br>(g/mol) <sup>b</sup> | M <sub>w</sub> /M <sub>n</sub> <sup>b</sup> | [η] <sup>b</sup><br>(mL/g) | Abs <sub>1726</sub> /Abs <sub>1776</sub> <sup>c</sup> | T <sub>g</sub> <sup>d</sup><br>(°C) | T <sub>d</sub> <sup>e</sup><br>(°C) | X <sub>n</sub> <sup>f</sup> |
|-------|----------------------|----------------------------------------|---------------------------------------------|----------------------------|-------------------------------------------------------|-------------------------------------|-------------------------------------|-----------------------------|
| 1     | none                 | 2560                                   | 2.6                                         | 3.0                        | 1.4                                                   | -nd-                                | 137                                 | 4                           |
| 2     | Zn(OAc) <sub>2</sub> | 4960                                   | 5.0                                         | 3.1                        | 1.3                                                   | -9                                  | 154                                 | 4                           |
| 3     | Ti(OBu) <sub>4</sub> | 5040                                   | 4.9                                         | 3.2                        | 1.6                                                   | -10                                 | 162                                 | 4                           |
| 4     | PTSA                 | 9350                                   | 2.2                                         | 6.7                        | 10                                                    | 57                                  | 286                                 | 17                          |

<sup>a</sup>Polymerizations conducted with catalyst (0.2 mol %) at 120°C for 24 h under dynamic vacuum (150 mbar) with [glycerol]/[**2**] = 1. <sup>b</sup>Measured by GPC in THF at 35°C using light scattering and viscometer detectors. <sup>c</sup>Absorbance ratios of ester (1726 cm<sup>-1</sup>) and anhydride (1776 cm<sup>-1</sup>) peaks determined by FTIR spectroscopy. <sup>d</sup>Determined by DSC (20 °C/min). <sup>e</sup>T<sub>d</sub> values reflect 5 % weight loss as measured by TGA (20 °C/min) under nitrogen. <sup>f</sup>Number-average degree of polymerization calculated from GPC data.

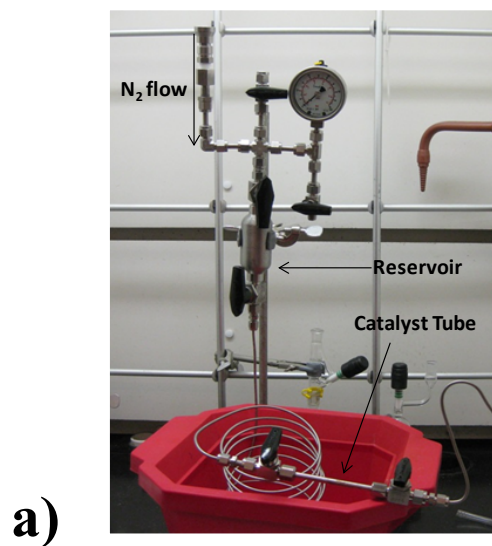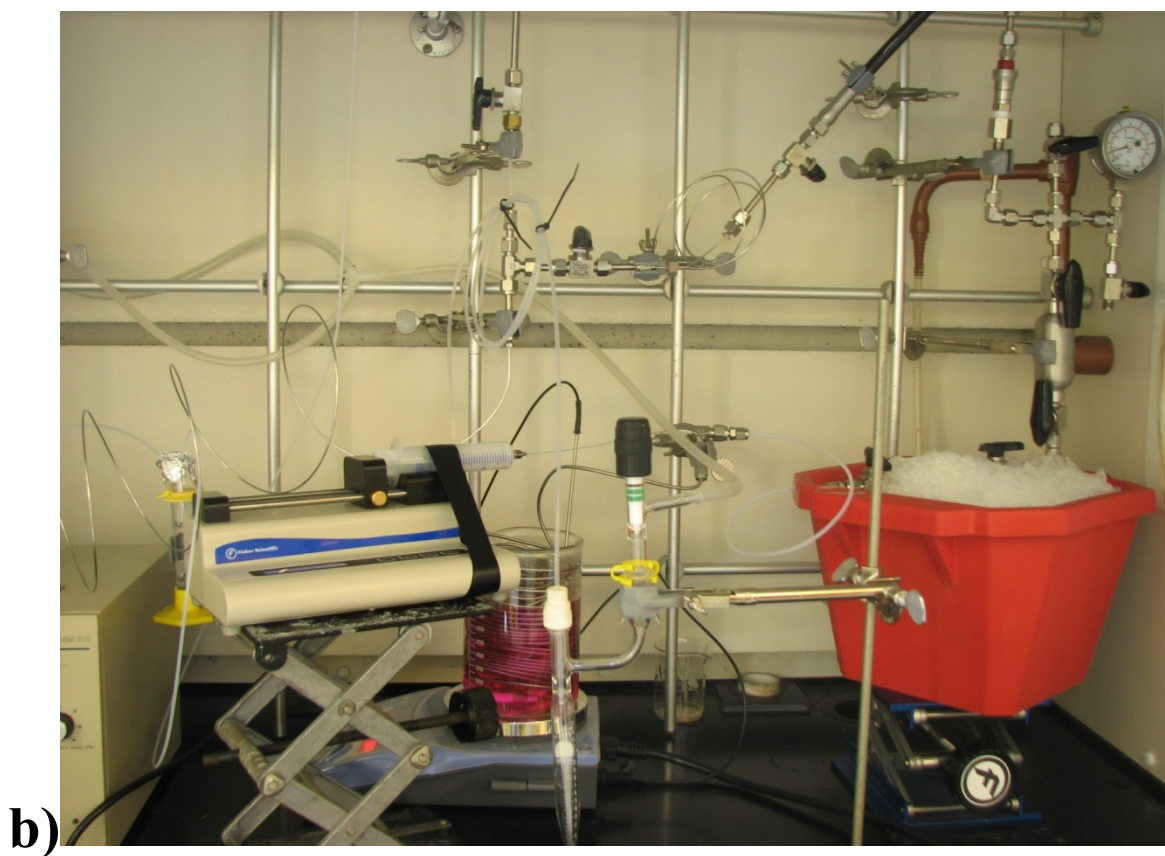

**Figure S1.** Continuous flow setup showing close-up of alkene isomerization reactor (top picture). The bottom picture shows the three step synthesis involving alkene isomerization

reactor (on right), syringe pump for MA solution (on left), heating bath for Diels-Alder reaction, and vertical hydrogenation tube (on top) with hydrogen inlet.

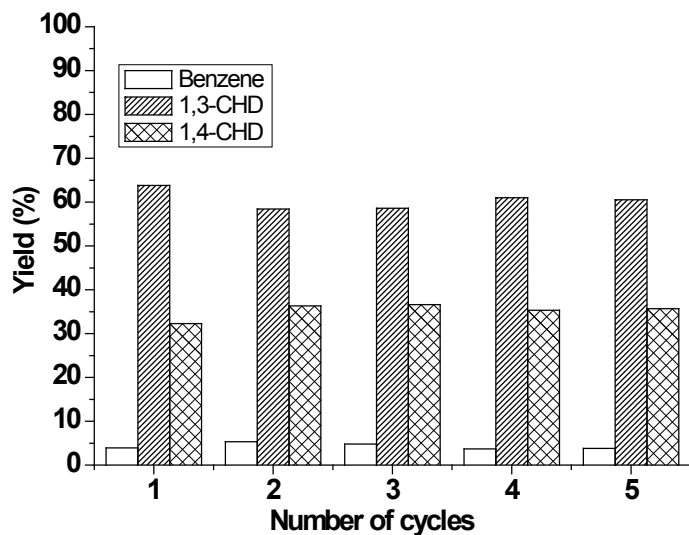

**Figure S2.** Recycling of catalyst (Na/Na<sub>2</sub>O) for the isomerization of 1,4-CHD to 1,3-CHD. The catalyst (100 mg) was subjected to sequential injections of 1,4-CHD (2 mL). The 1,3-CHD:1,4-CHD ratio reflects the thermodynamic stability of the isomers at 0°C.

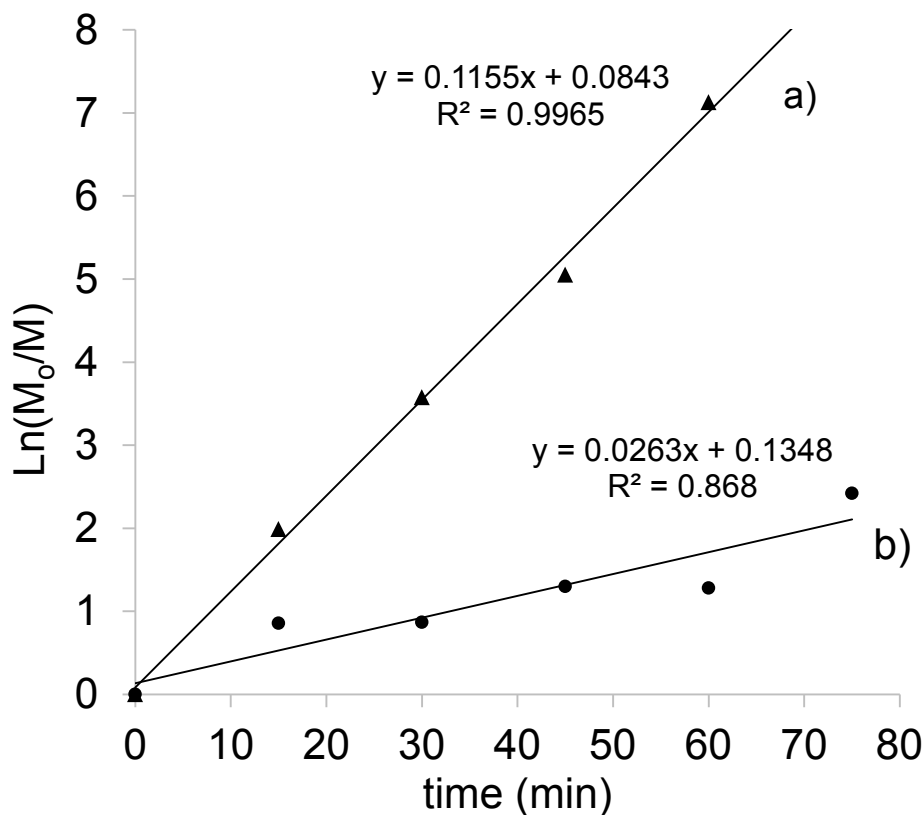

**Figure S3.** Comparison of Diels Alder reaction of maleic anhydride and 1,3-cyclohexadiene at a) 75 °C and b) 50 °C. The reaction was conducted with MA (1.66 g) in ethyl acetate (12 mL) with 1,3-CHD (4 mL). Data collected by examining the disappearance of the alkene C-H absorbance for maleic anhydride with FTIR spectroscopy.

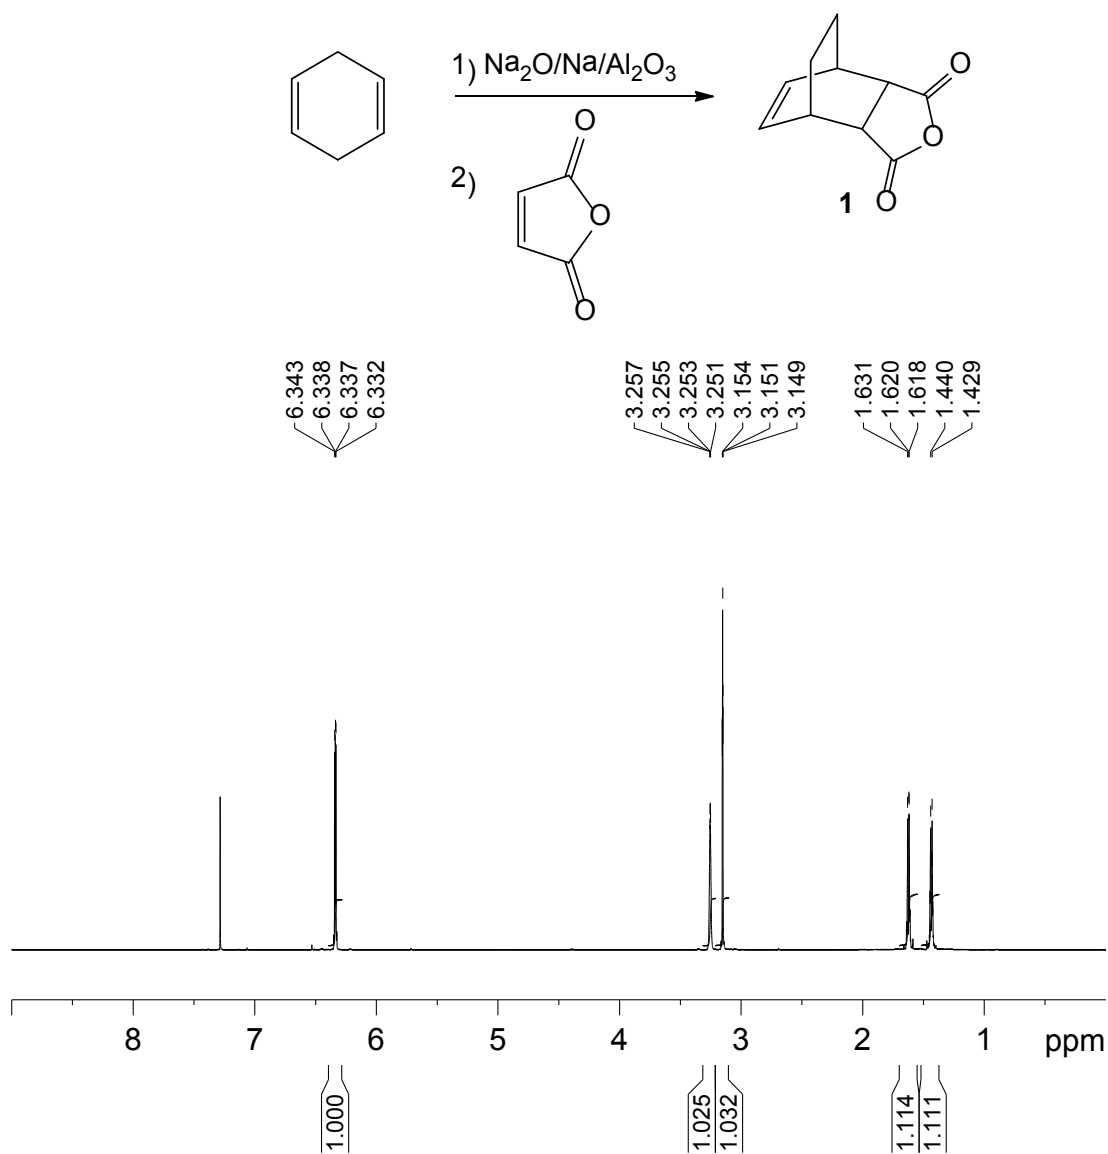

**Figure S4.** <sup>1</sup>H NMR spectrum (700 MHz, CDCl<sub>3</sub>) for the Diels Alder product (**1**) of maleic anhydride and 1,3-cyclohexadiene. Initially, the 1,4-cyclohexadiene was isomerized at 0°C before adding to the maleic anhydride. The Diels Alder reaction was conducted without additional solvent at 60°C for 3 h before recovering the product in 88 % yield.

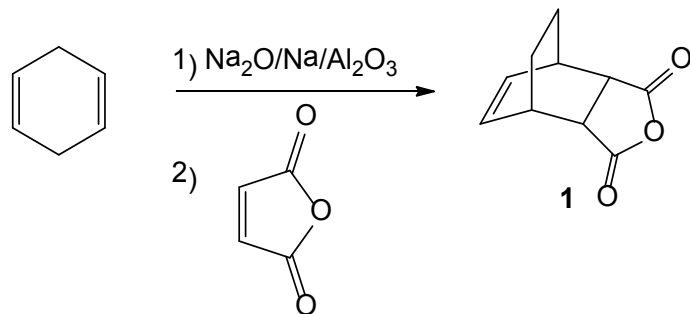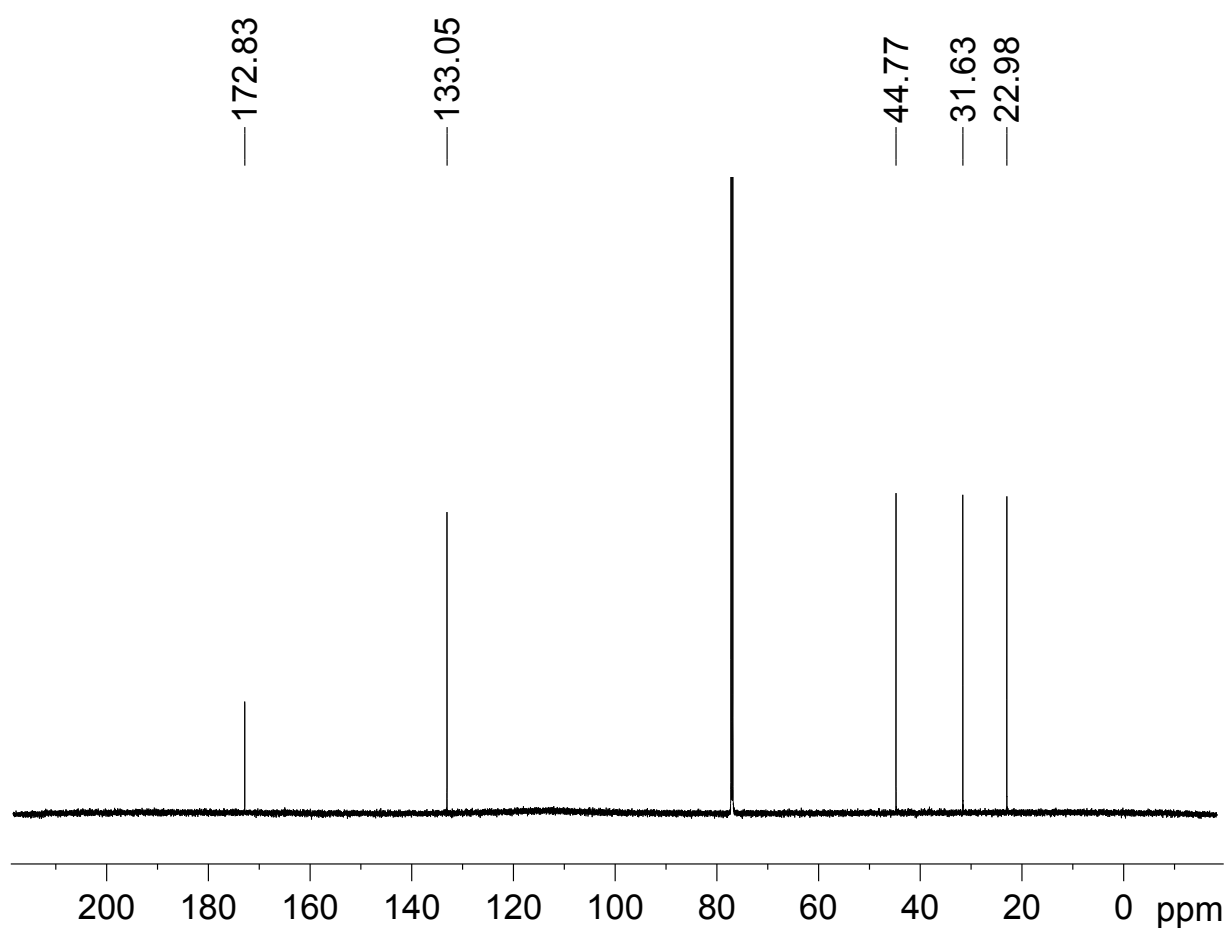

**Figure S5.**  $^{13}\text{C}$  NMR spectrum (700 MHz,  $\text{CDCl}_3$ ) for the Diels Alder product (**1**) of maleic anhydride and 1,3-cyclohexadiene.

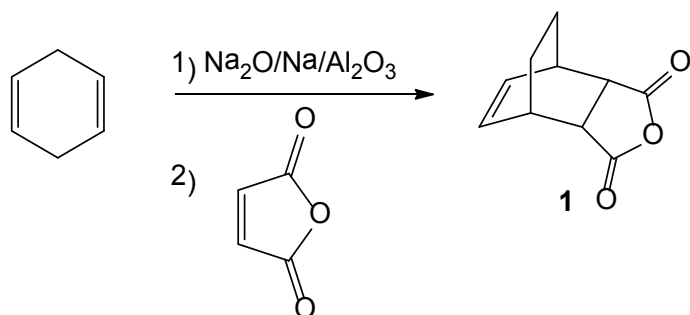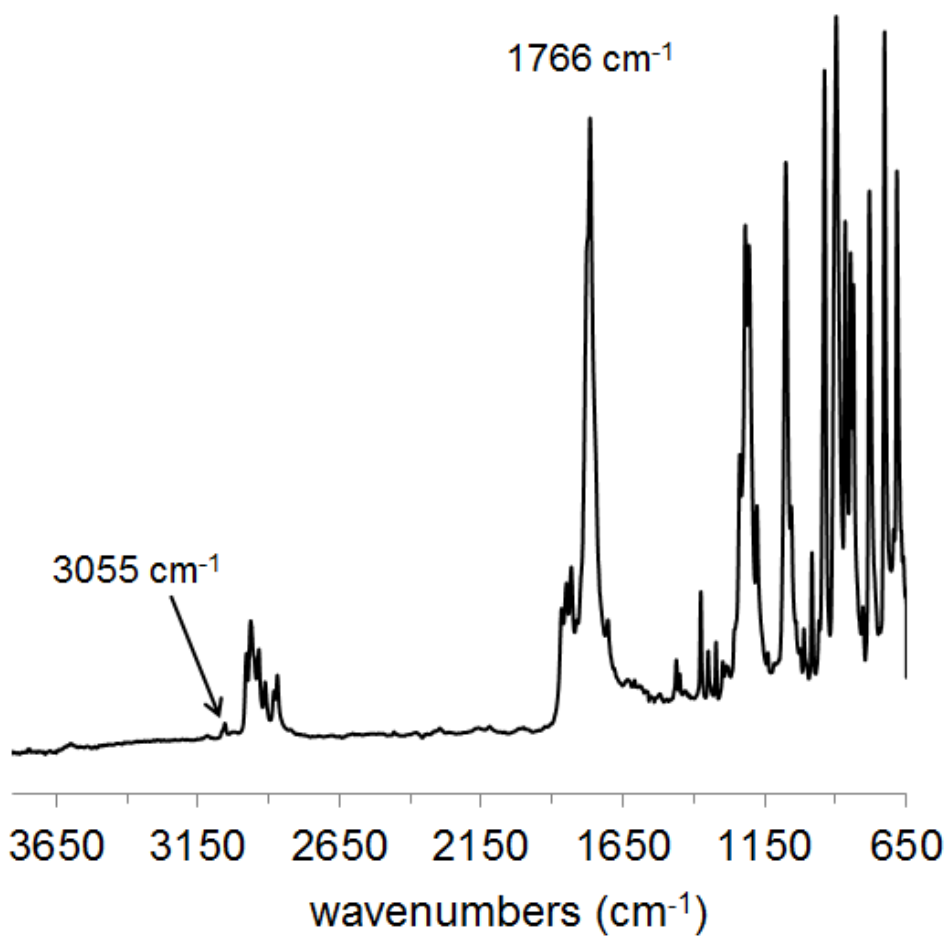

**Figure S6.** FTIR data for the Diels Alder product (**1**) of maleic anhydride and 1,3-cyclohexadiene. The Diels Alder reaction was conducted under neat conditions at 60°C for 3 h before recovering the product in 88 % yield. The alkene C-H absorbance was detected at 3055  $\text{cm}^{-1}$ .

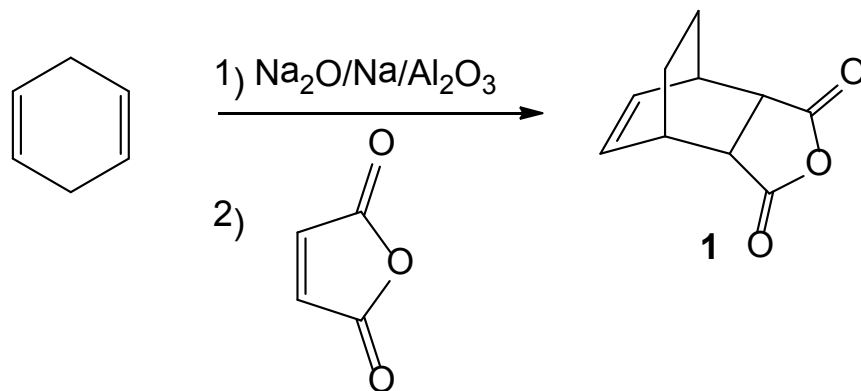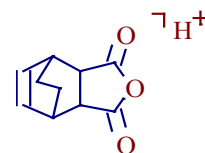

Theo 179.07027  
Actual 179.07023  
-0.227 ppm difference

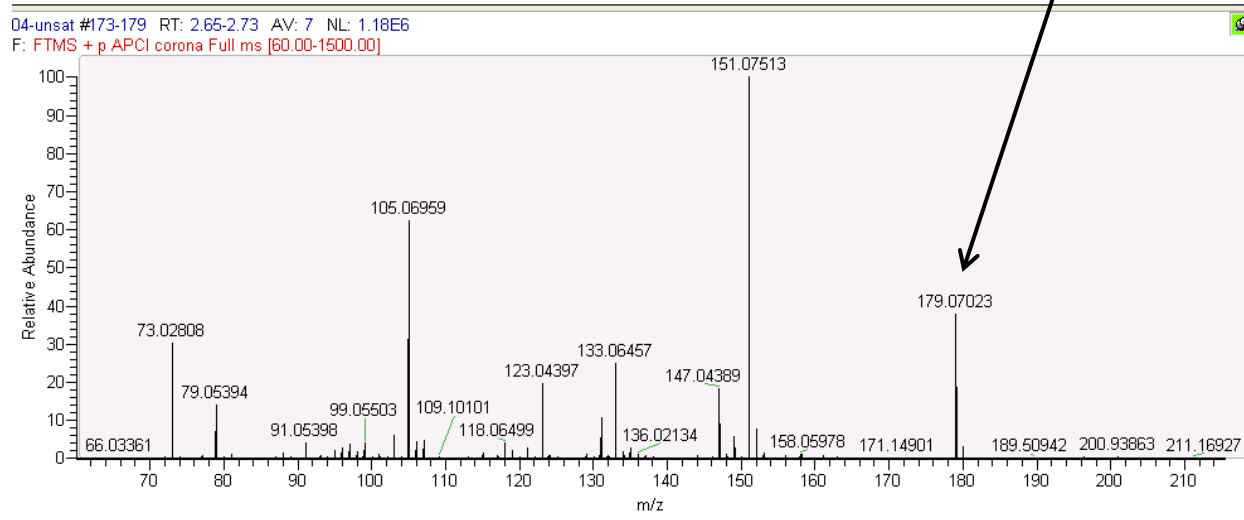

**Figure S7.** LC/MS data for the Diels Alder adduct (**1**) of maleic anhydride and 1,3-cyclohexadiene.



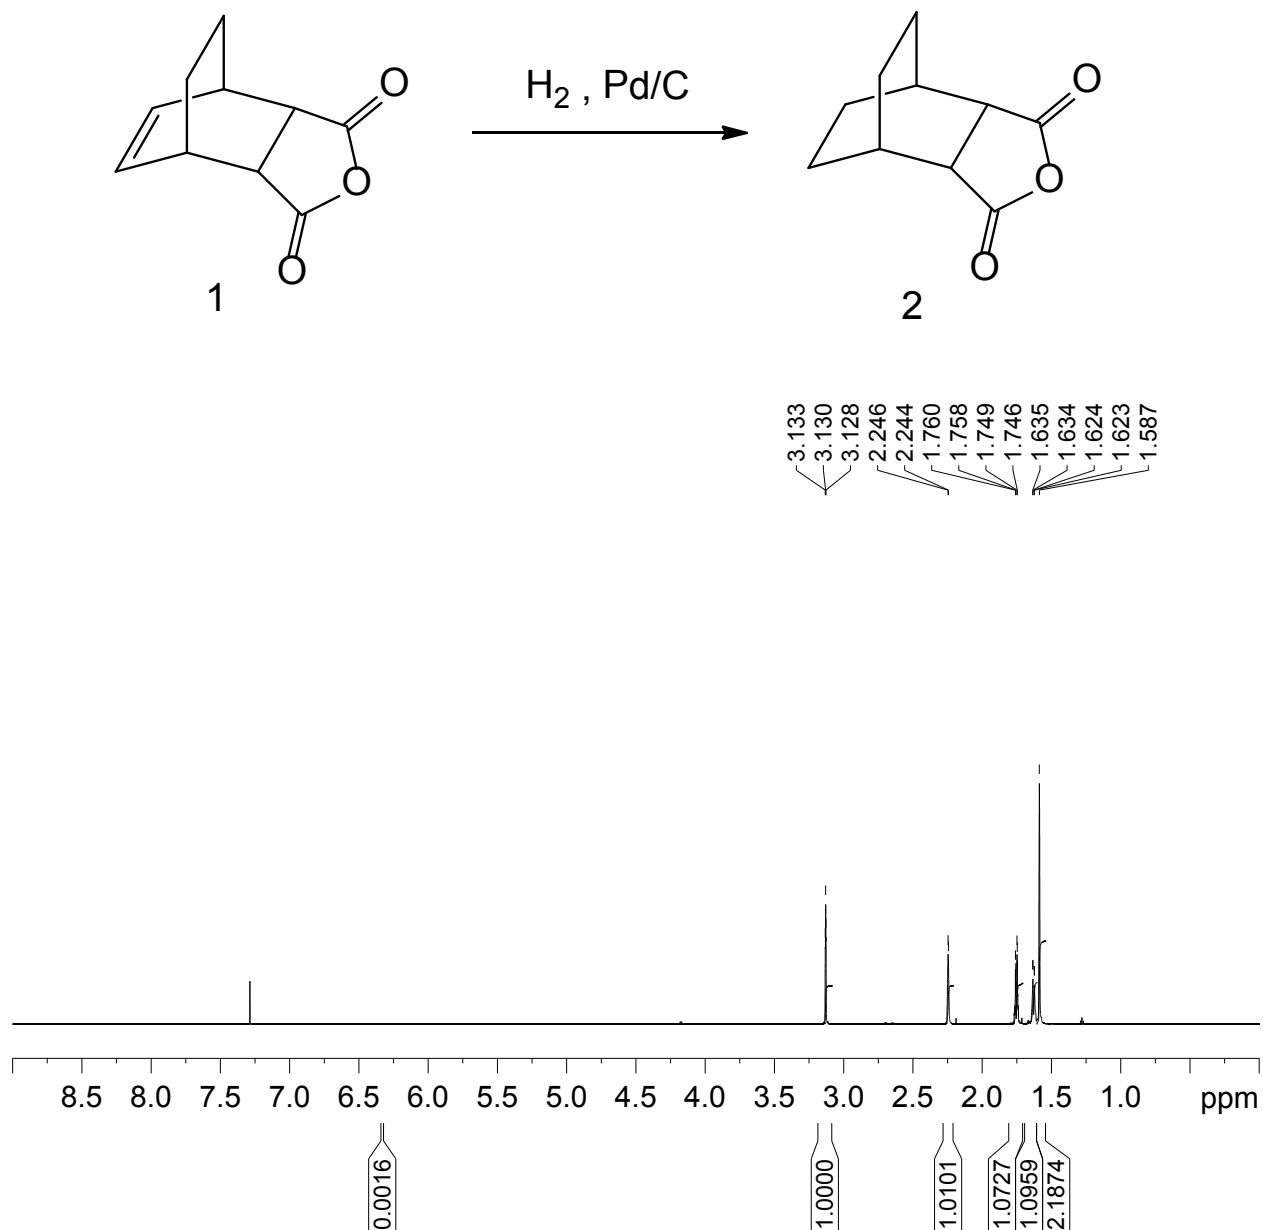

**Figure S8.** <sup>1</sup>H NMR spectrum (700 MHz, CDCl<sub>3</sub>) for the product (2) resulting from the hydrogenation of the Diels Alder adduct (1) in ethyl acetate using Pd/C and hydrogen (20 psi). The reaction was conducted at ambient temperature for 1 day before recovering the product in 95% yield. Based on the disappearance of the alkene integration at δ 6.3 ppm, the hydrogenation was > 99.8 %.

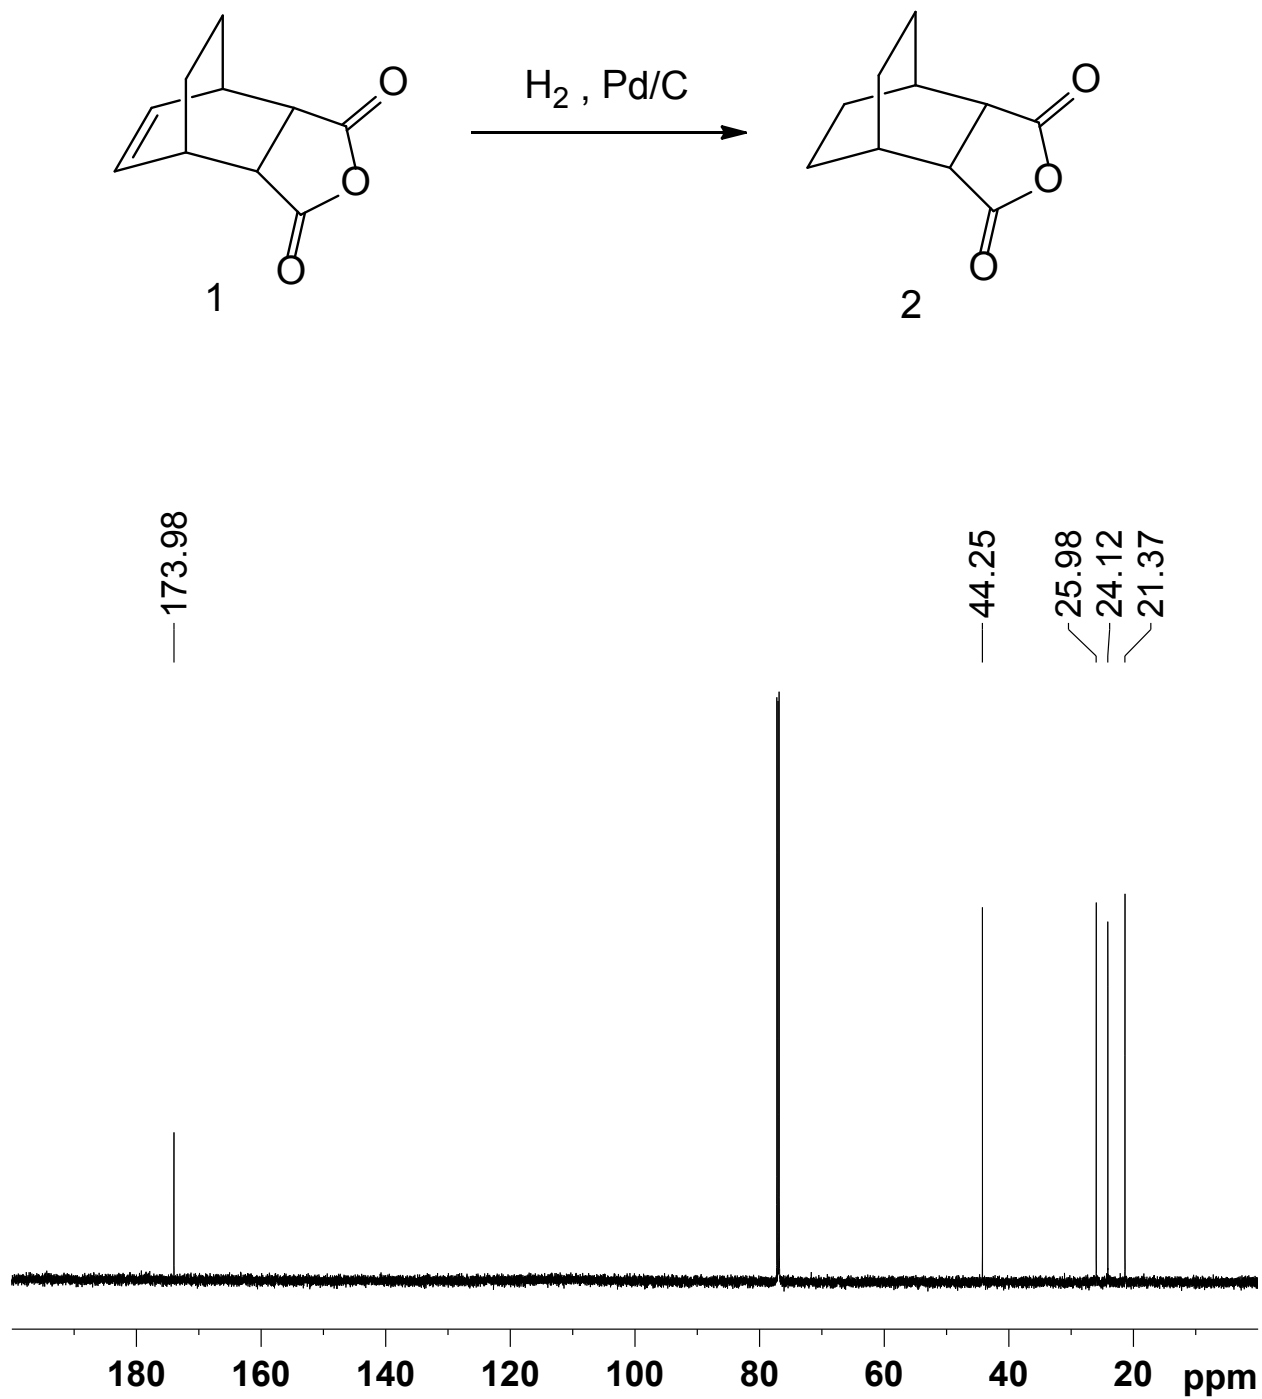

**Figure S9.** <sup>13</sup>C NMR spectrum (700 MHz, CDCl<sub>3</sub>) for the product (2) resulting from the hydrogenation of the Diels Alder adduct (1) in ethyl acetate using Pd/C and hydrogen (20 psi).

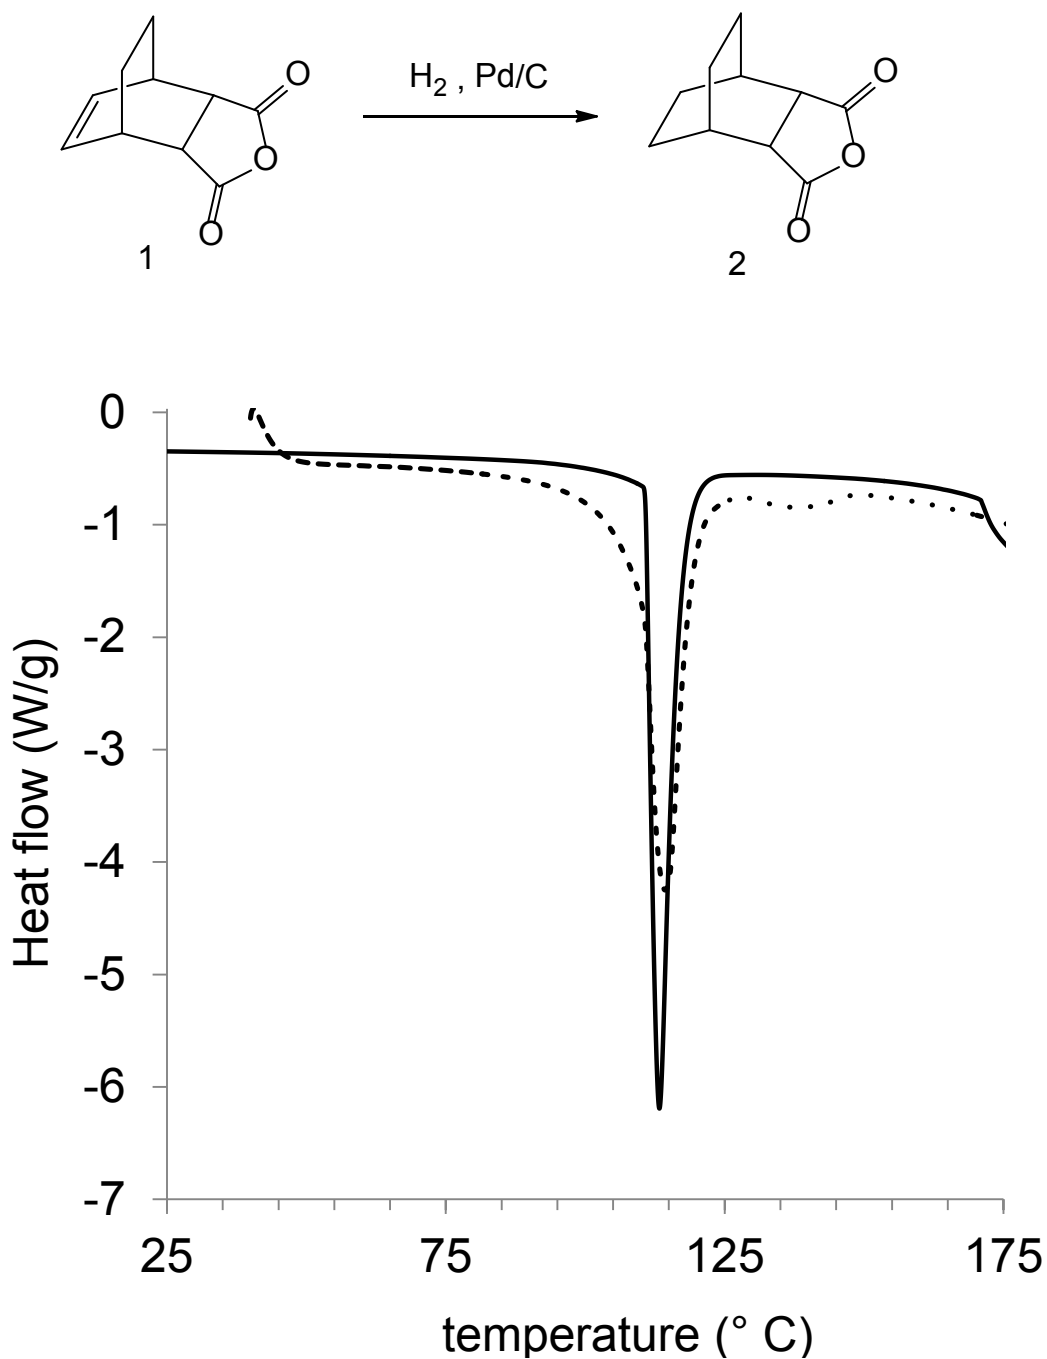

**Figure S10.** Differential scanning calorimetry (DSC) data (20  $^{\circ}C/min$ ) for the product (solid line, 2) resulting from the hydrogenation of the Diels Alder adduct (dashed line, 1) in ethyl acetate using Pd/C and hydrogen (20 psi). The reaction was conducted at ambient temperature for 1 day before filtering the Pd/C and recovering the product in 95% yield.

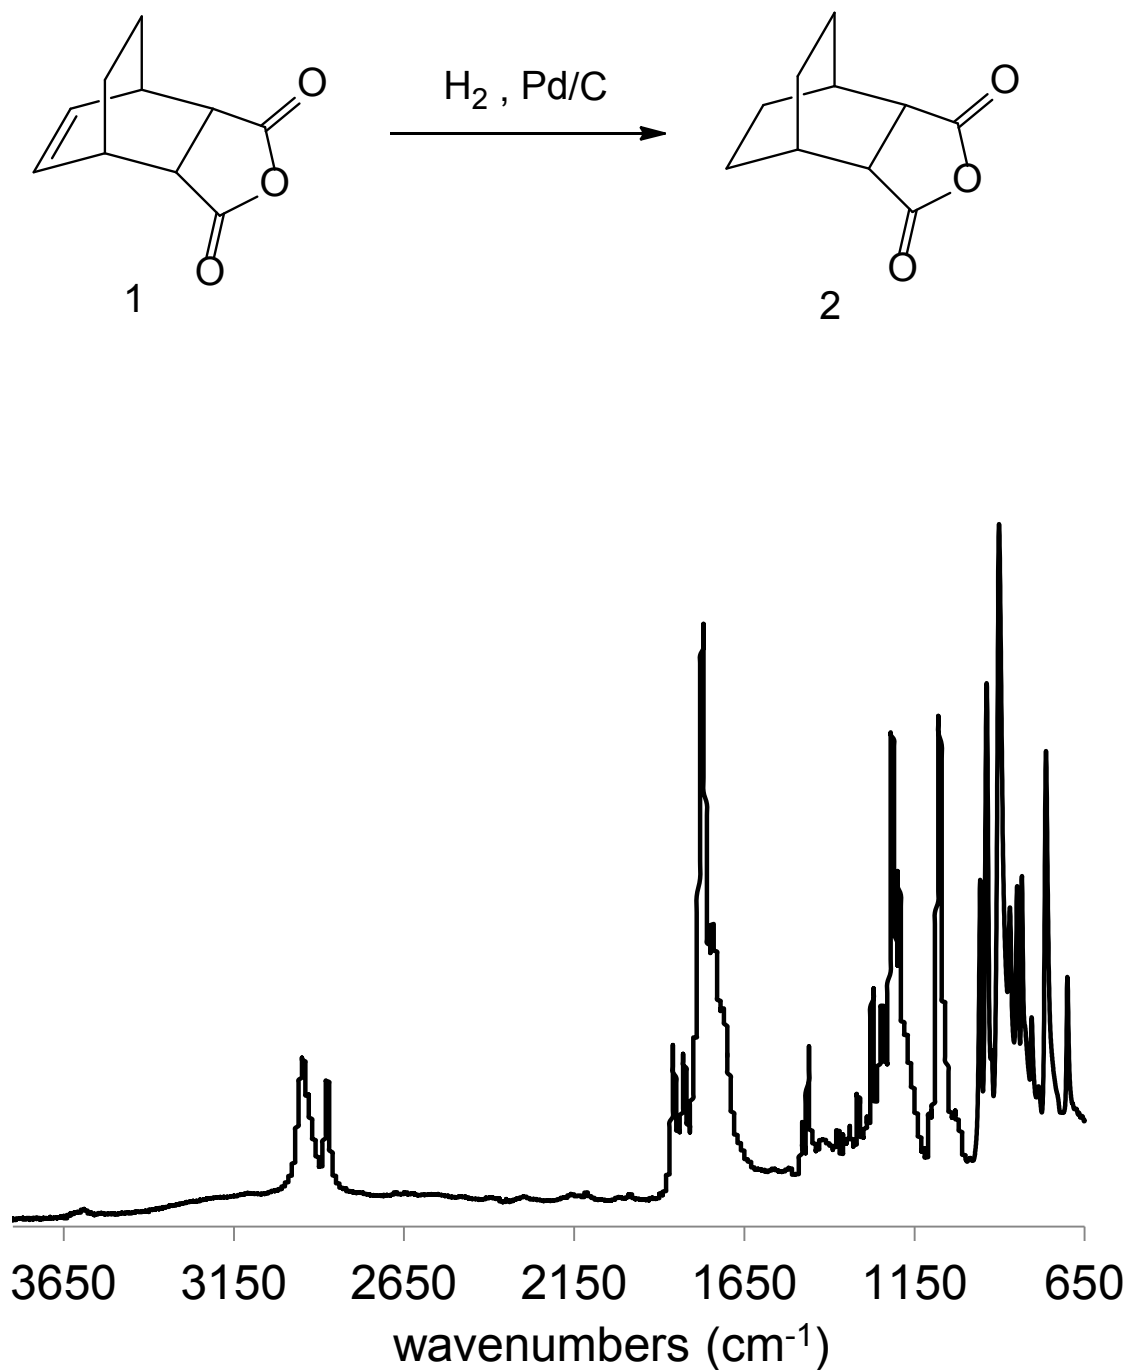

**Figure S11.** FTIR data for the product (2) resulting from the hydrogenation of the Diels Alder adduct (1) in ethyl acetate using Pd/C and hydrogen (20 psi). The reaction was conducted at ambient temperature for 2 days before filtering the Pd/C and recovering the product in 95% yield.

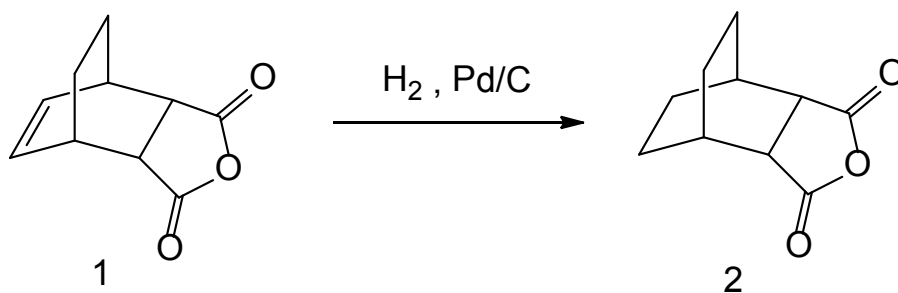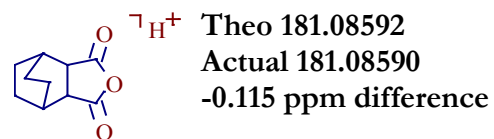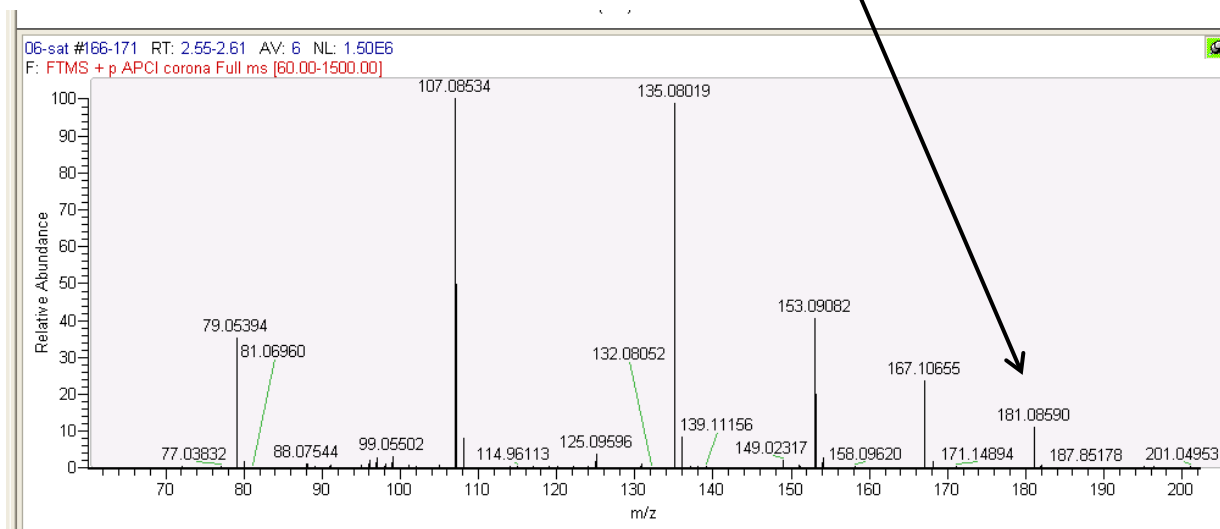

**Figure S12.** LC/MS data for the product resulting from the hydrogenation of the Diels Alder adduct in ethyl acetate using Pd/C and hydrogen (20 psi).

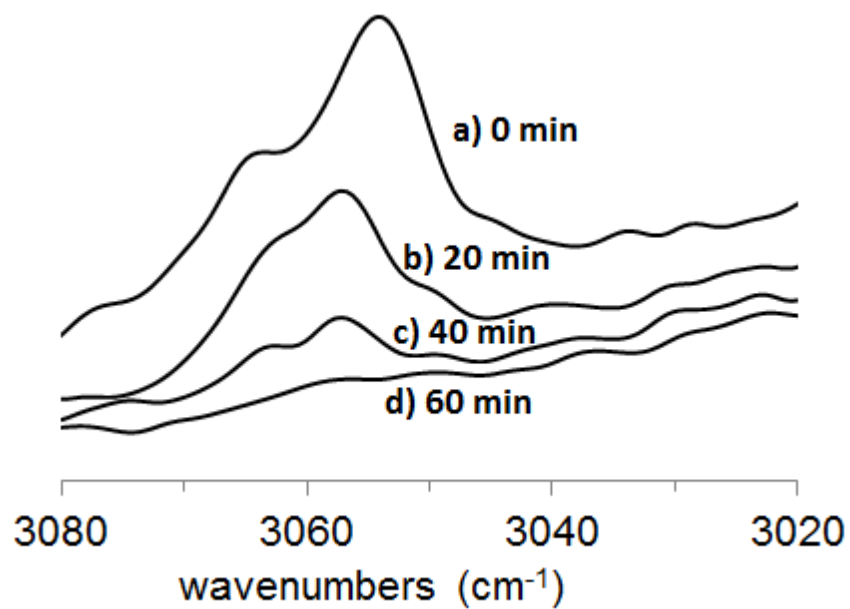

**Figure S13.** Overlay of FTIR spectra showing the disappearance of the alkene C-H absorbance ( $3055\text{ cm}^{-1}$ ) at different time intervals during the hydrogenation of Diels Alder product (**1**). The data was used in Figure S14b.

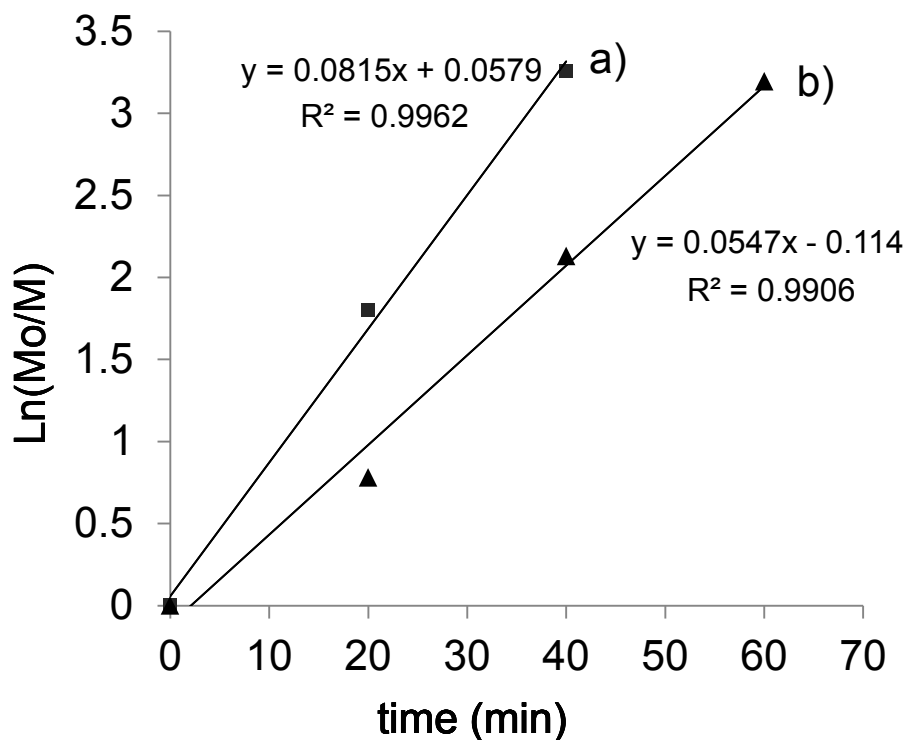

**Figure S14.** Comparison of continuous flow hydrogenation data for the hydrogenation of a) cyclooctene with b) Diels Alder product (monomer **1**). Both reactions were conducted in ethyl acetate at a concentration of 0.06 g/mL. The comparison of monomer **1** and cyclooctene used a continuous flow setup (1.8 mL/min) at ambient temperature with 0.50 g Pd/C and 125 psi hydrogen. Data for hydrogenation was collected and analyzed with GC (cyclooctene) and FTIR (monomer **1**).

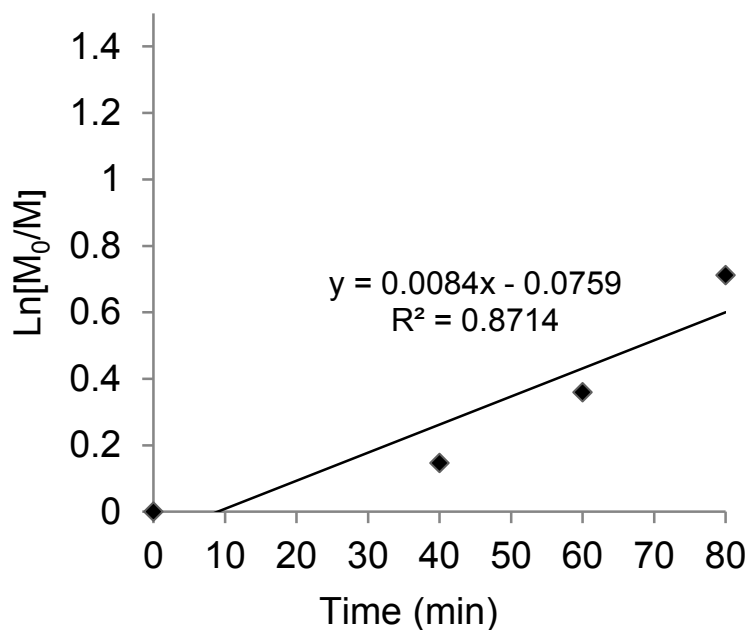

**Figure S15.** Continuous flow hydrogenation of Diels Alder product (monomer **1**) with less Pd/C than Figure S14. The reaction was conducted in ethyl acetate at a concentration of 0.06 g/mL and flow rate of 1.8 mL/min at ambient temperature with 0.30 g Pd/C and 125 psi hydrogen. The decrease in catalyst loading in Figure S15 gave a slower hydrogenation rate ( $k_{\text{rel}} = 1$ ) compared to Figure S14b ( $k_{\text{rel}} = 6.5$ ).



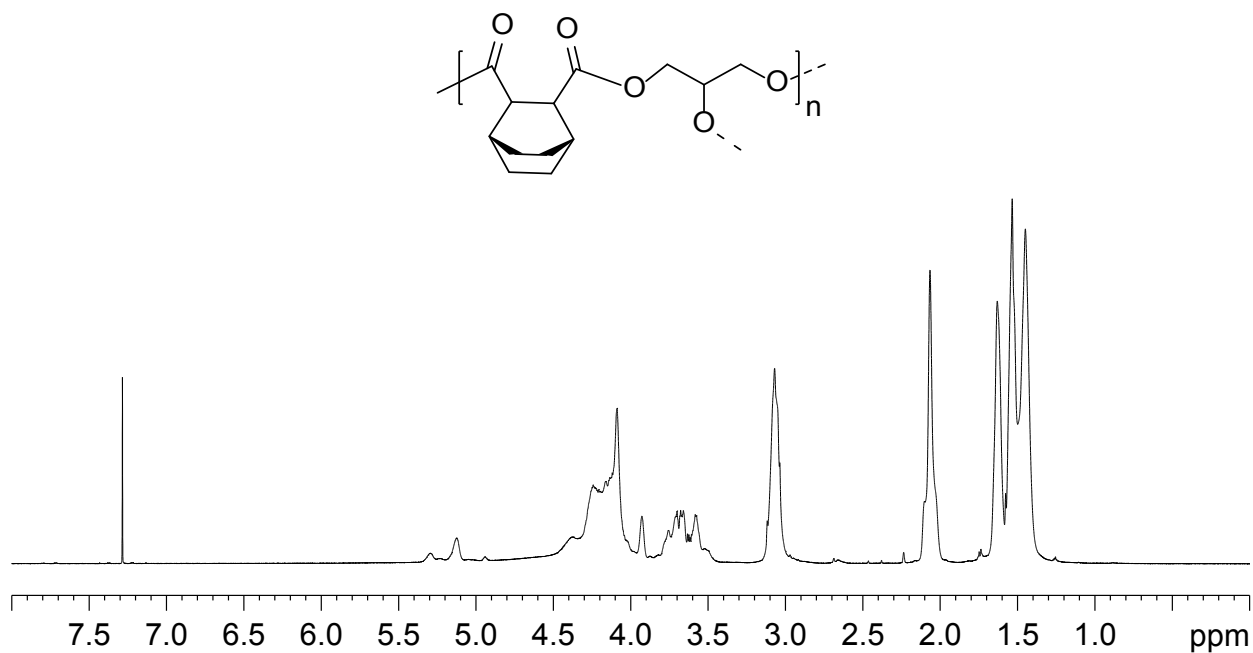

**Figure S16.** <sup>1</sup>H NMR spectrum (700 MHz, CDCl<sub>3</sub>) of polyester synthesized from bicyclic anhydride **2** and glycerol after 24 h at 120 °C under dynamic vacuum (150 mbar).

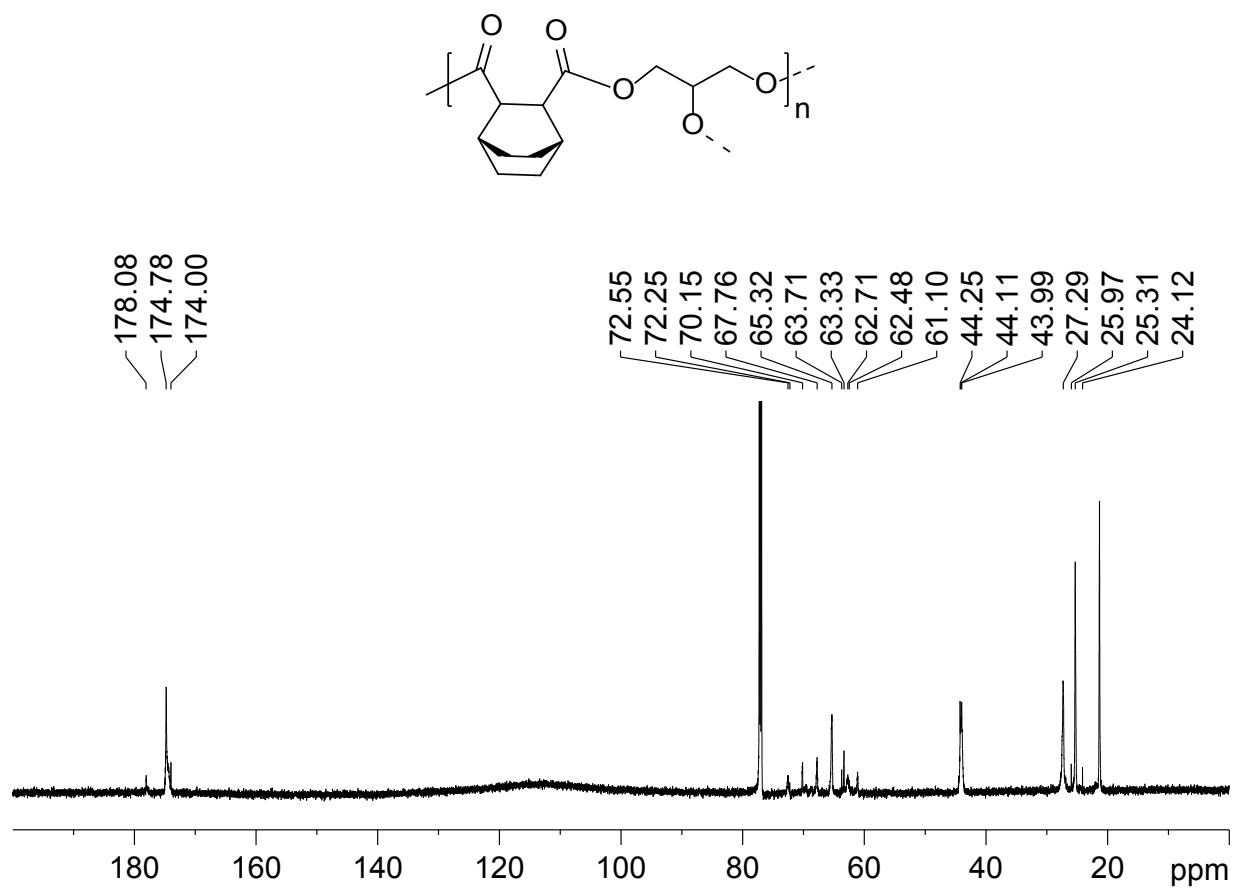

**Figure S17.**  $^{13}\text{C}$  NMR spectrum (700 MHz,  $\text{CDCl}_3$ ) of polyester synthesized from bicyclic anhydride **2** and glycerol after 24 h at 120 °C under dynamic vacuum (150 mbar).

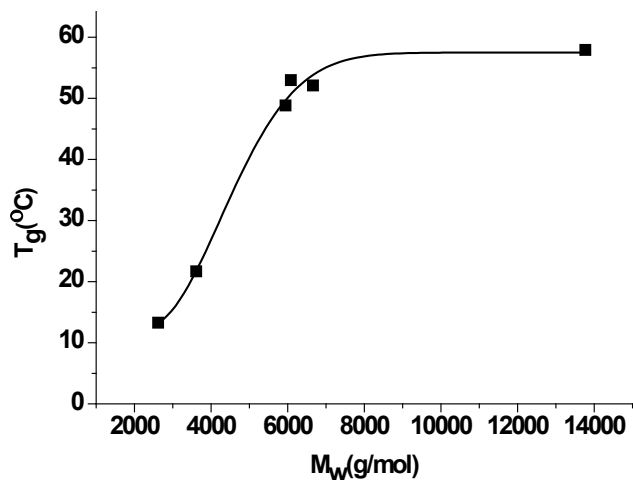

**Figure S18.** Dependence of glass transition temperature on  $M_w$  for the polymerization of glycerol with anhydride **2** ( $[\text{glycerol}]/[\text{anhydride } \mathbf{2}] = 1$ ).

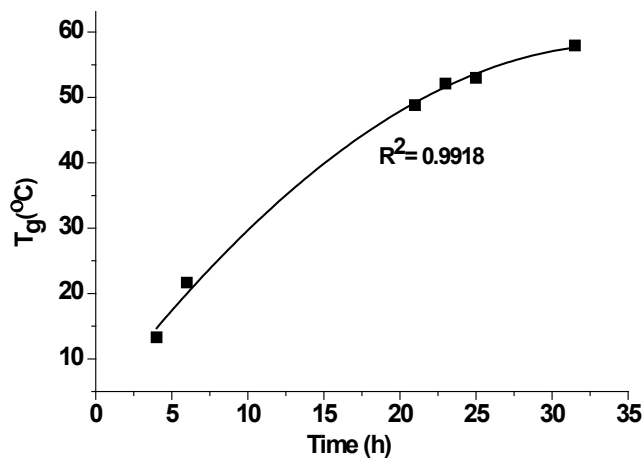

**Figure S19.** Correlation between the glass transition temperature and the reaction time for the polymerization of glycerol with anhydride **2** ( $[\text{glycerol}]/[\text{anhydride } \mathbf{2}] = 1$ ).
